# Supplementary material
Source: Springer Nature journal article supplement (https://www.springermedizin.de/resource/supplementary/13024_2012_360_MOESM1_ESM.pdf/9643812)

Additional File 1

Fig.S1

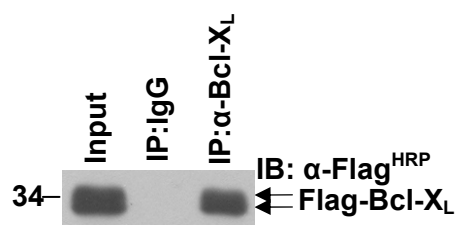

Fig.S2

A

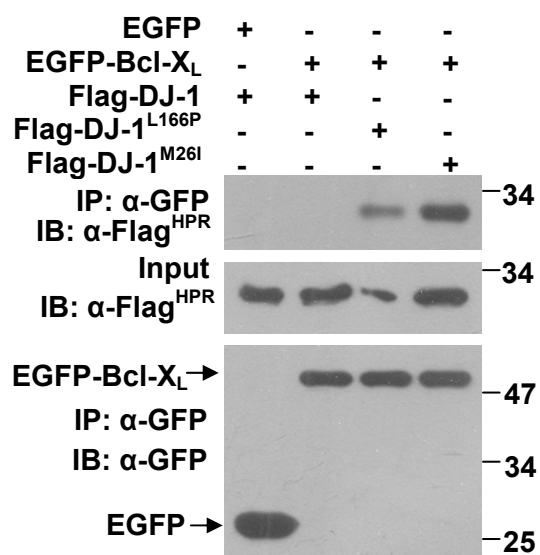

B

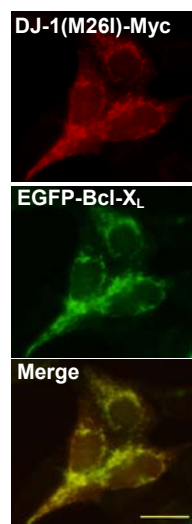

Supplement: MOESM1 [file 9643812]
